# Supplementary material for: Redistributing Zn ion flux by bifunctional graphitic carbon nitride nanosheets for dendrite-free zinc metal anodes
Source: Royal Society of Chemistry journal article supplement (doi:10.1039/d1ta08697a), 2021-01-01
Supplement: d1ta08697a1.pdf [file d1ta08697a1.pdf]

## Electronic Supplementary Material

Redistributing Zn ion flux by bifunctional graphitic carbon nitride nanosheets for dendrite-free zinc metal anodes

Lisha Wu,<sup>a</sup> Ying Zhang,<sup>bcd</sup> Ping Shang,<sup>a</sup> Yanfeng Dong<sup>\*a</sup> and Zhong-Shuai Wu<sup>\*bc</sup>

<sup>a</sup> Department of Chemistry, College of Sciences, Northeastern University, Shenyang 110819, China. E-mail: dongyanfeng@mail.neu.edu.cn

<sup>b</sup> State Key Laboratory of Catalysis, Dalian Institute of Chemical Physics, Chinese Academy of Sciences, Dalian 116023, China. E-mail: wuzs@dicp.ac.cn

<sup>c</sup> Dalian National Laboratory for Clean Energy, Chinese Academy of Sciences, Dalian 116023, China

<sup>d</sup> University of Chinese Academy of Sciences, 19 A Yuquan Road, Beijing 100049, China

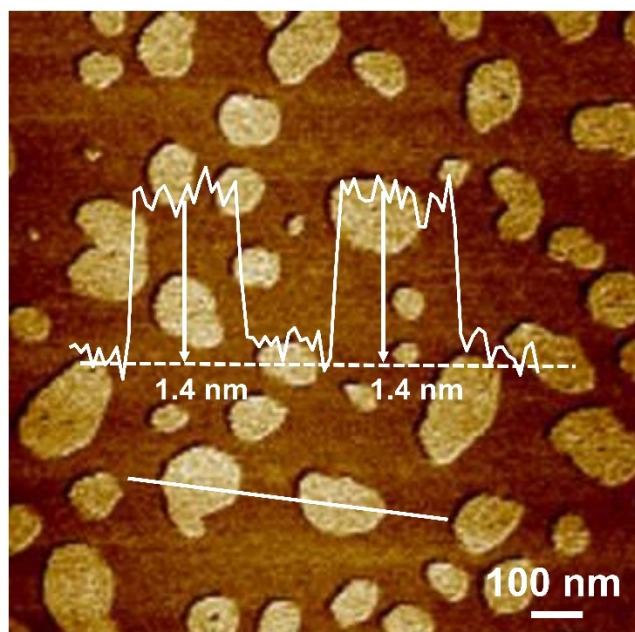

**Fig. S1** AFM image of g-C<sub>3</sub>N<sub>4</sub> nanosheets.

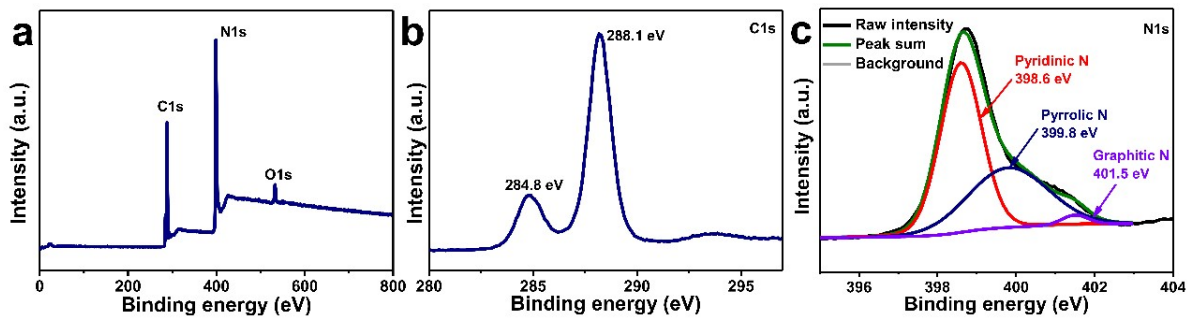

**Fig. S2** (a) XPS spectrum of g-C<sub>3</sub>N<sub>4</sub> nanosheets. High-resolution (b) C1s and (c) N1s XPS spectra of g-C<sub>3</sub>N<sub>4</sub> nanosheets.

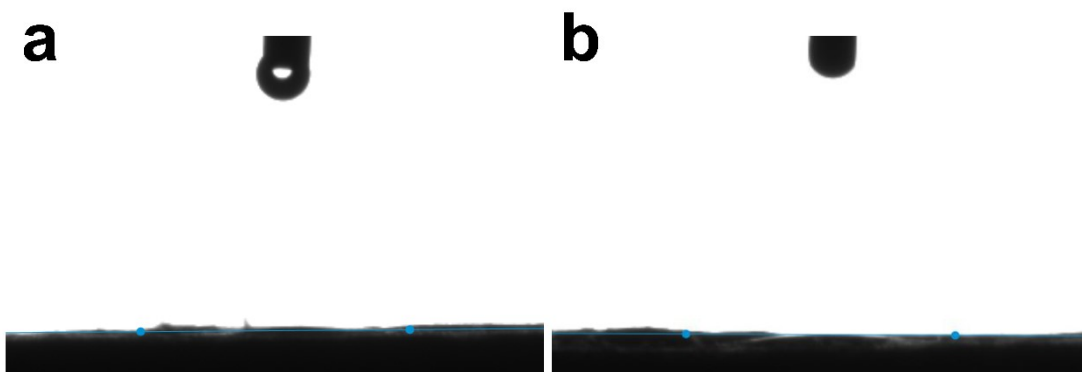

**Fig. S3** Contact angle test of (a) GF separator and (b) g-C<sub>3</sub>N<sub>4</sub>/GF separator.

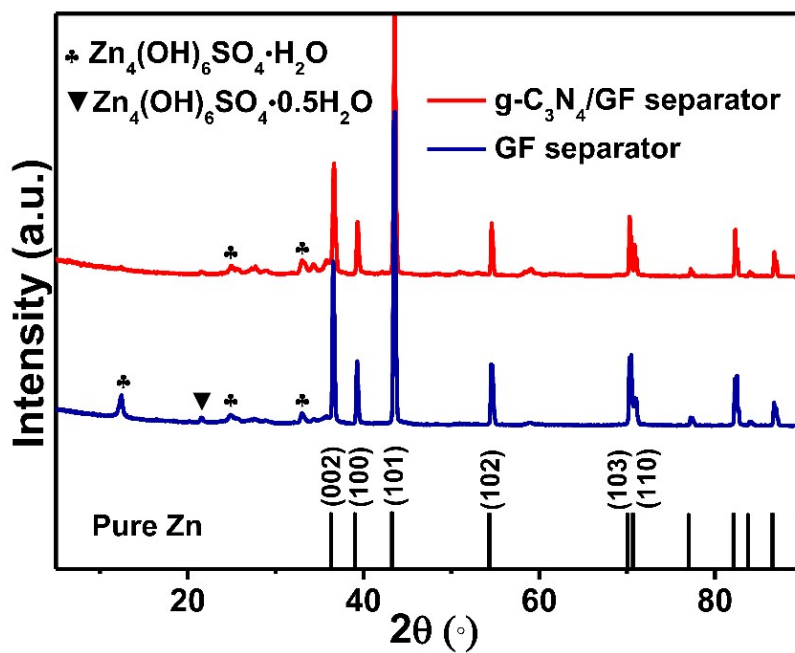

**Fig. S4** XRD patterns of Zn foils in Zn//Zn symmetrical batteries assembled with GF and g-C<sub>3</sub>N<sub>4</sub>/GF separators after cycling for 100 h at 2 mA cm<sup>-2</sup> and 2 mAh cm<sup>-2</sup>.

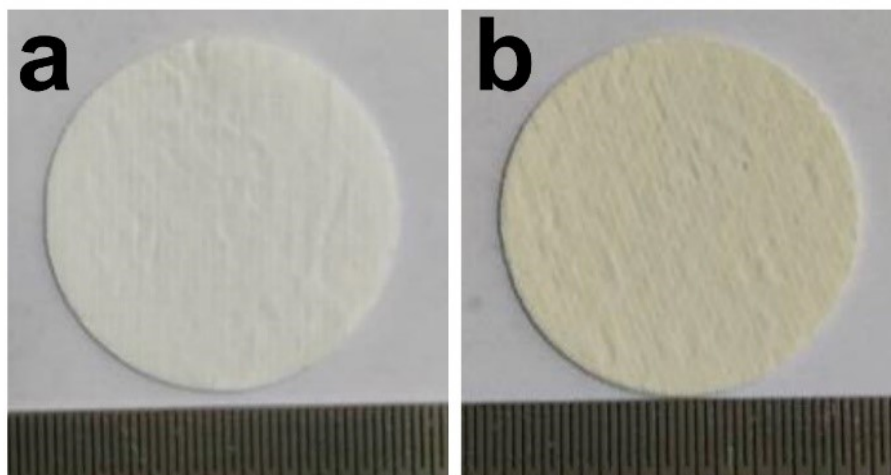

**Fig. S5** Photographs of g-C<sub>3</sub>N<sub>4</sub>/GF separators with a mass loading of (a) 0.05 mg cm<sup>-2</sup> and (b) 0.5 mg cm<sup>-2</sup>.

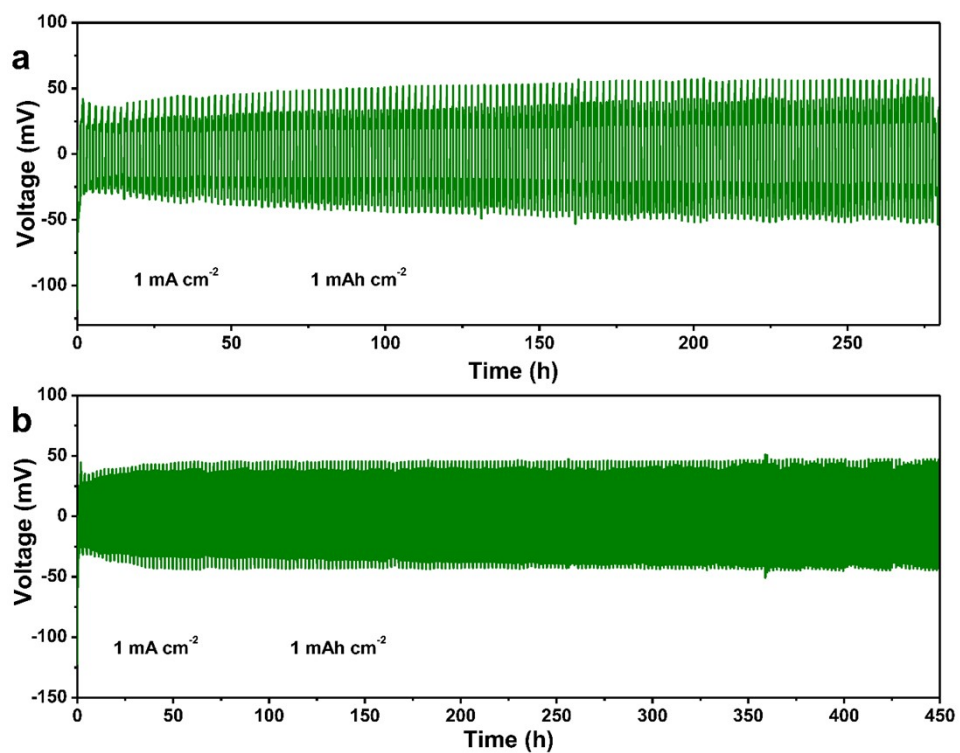

**Fig. S6** Cycling performance of Zn//Zn symmetrical batteries equipped with g-C<sub>3</sub>N<sub>4</sub>/GF separator with a mass loading of (a) 0.05 mg cm<sup>-2</sup> and (b) 0.5 mg cm<sup>-2</sup> at 1 mA cm<sup>-2</sup> and 1 mAh cm<sup>-2</sup>.

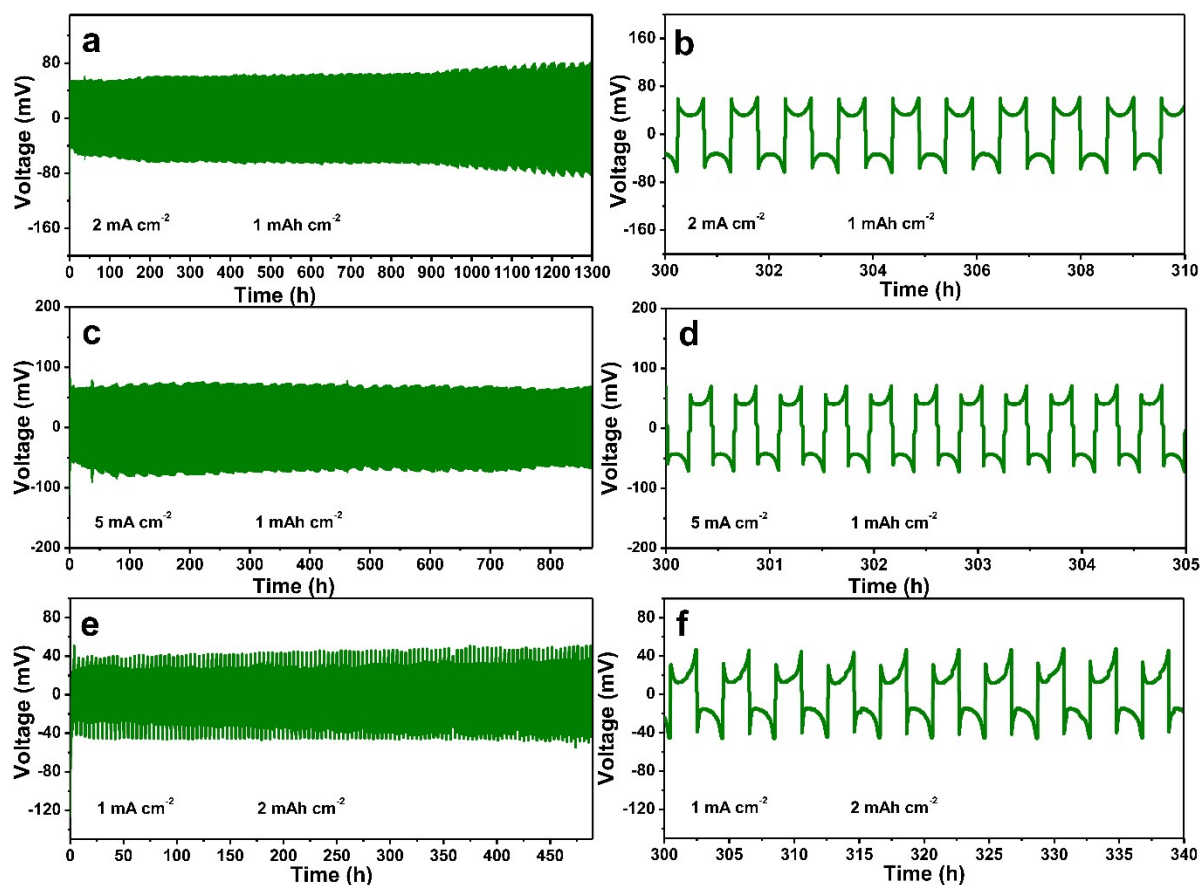

**Fig. S7** (a, c, d) Cycling performance and (b, d, f) corresponding voltage profiles at selected cycles for Zn//Zn symmetrical batteries equipped with g-C<sub>3</sub>N<sub>4</sub>/GF separators with mass loading of  $0.1 \text{ mg cm}^{-2}$  at (a, b)  $2 \text{ mA cm}^{-2}$  and (c, d)  $5 \text{ mA cm}^{-2}$  for  $1 \text{ mAh cm}^{-2}$ , and (e, f)  $1 \text{ mA cm}^{-2}$  for  $2 \text{ mAh cm}^{-2}$ .



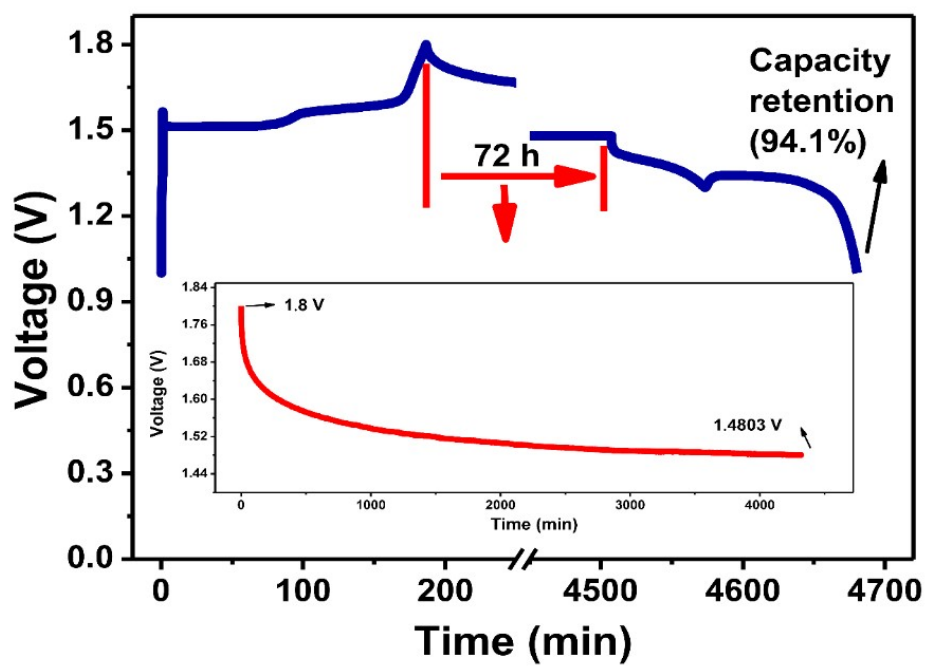

Fig. S8 Self-discharge test of Zn//MnO<sub>2</sub> battery with GF separators.

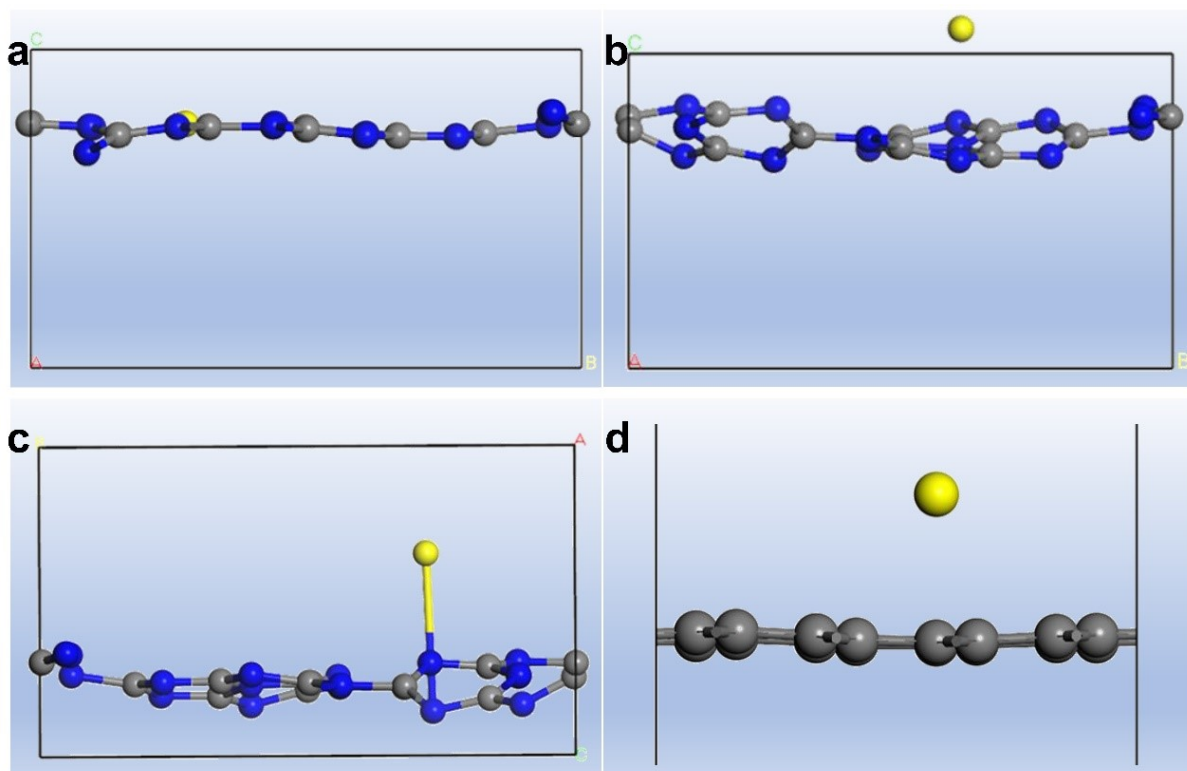

**Fig. S9** Structural models (side view) of g-C<sub>3</sub>N<sub>4</sub> with specific sites including (a) the center of in-plane pore (N1 site), (b) bridge nitrogen site (N2 site), and (c) edge nitrogen site (N3 site), and (d) graphene (G) for calculating the binding energies between Zn<sup>2+</sup> ion and each model.

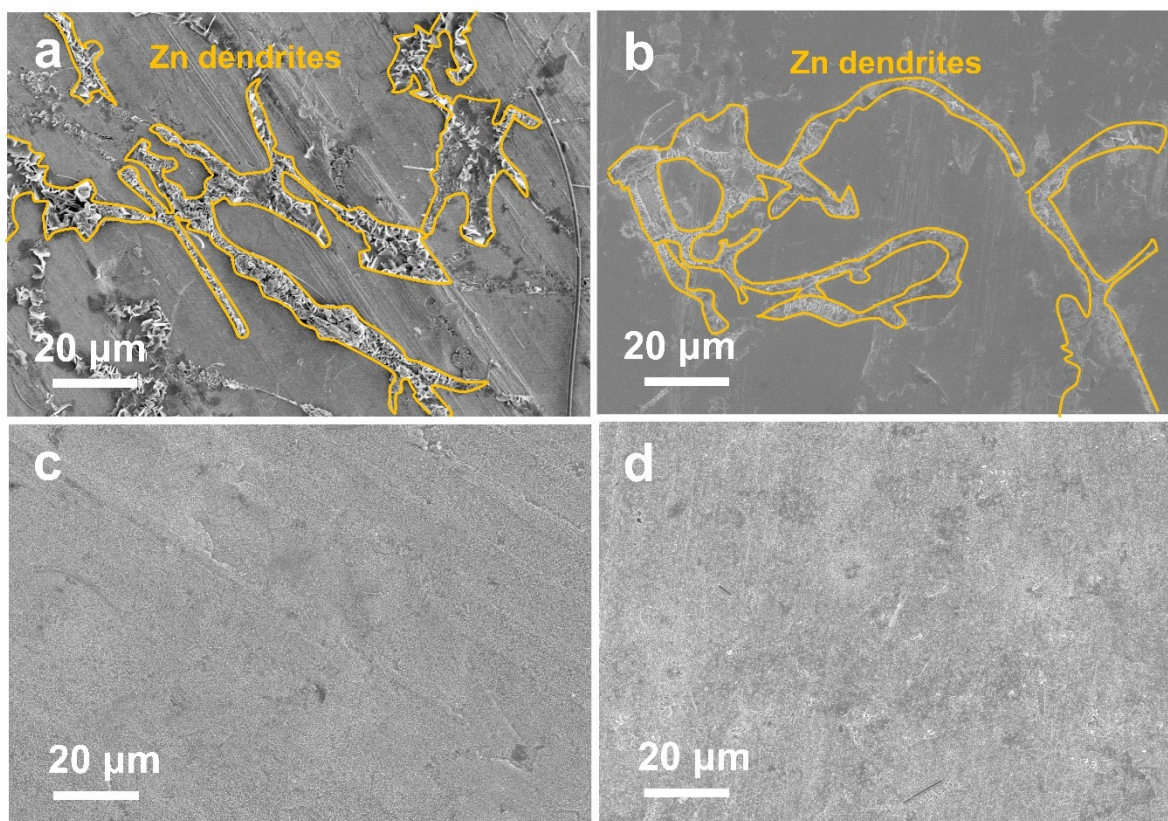

**Fig. S10** SEM images of Zn foil anodes in Zn//Zn symmetric cells with (a, b) GF separators and (c, d) g-C<sub>3</sub>N<sub>4</sub>/GF separators, plated at (a, c) 1 mA cm<sup>-2</sup> and (b, d) 2 mA cm<sup>-2</sup> for 0.33 mAh cm<sup>-2</sup>.

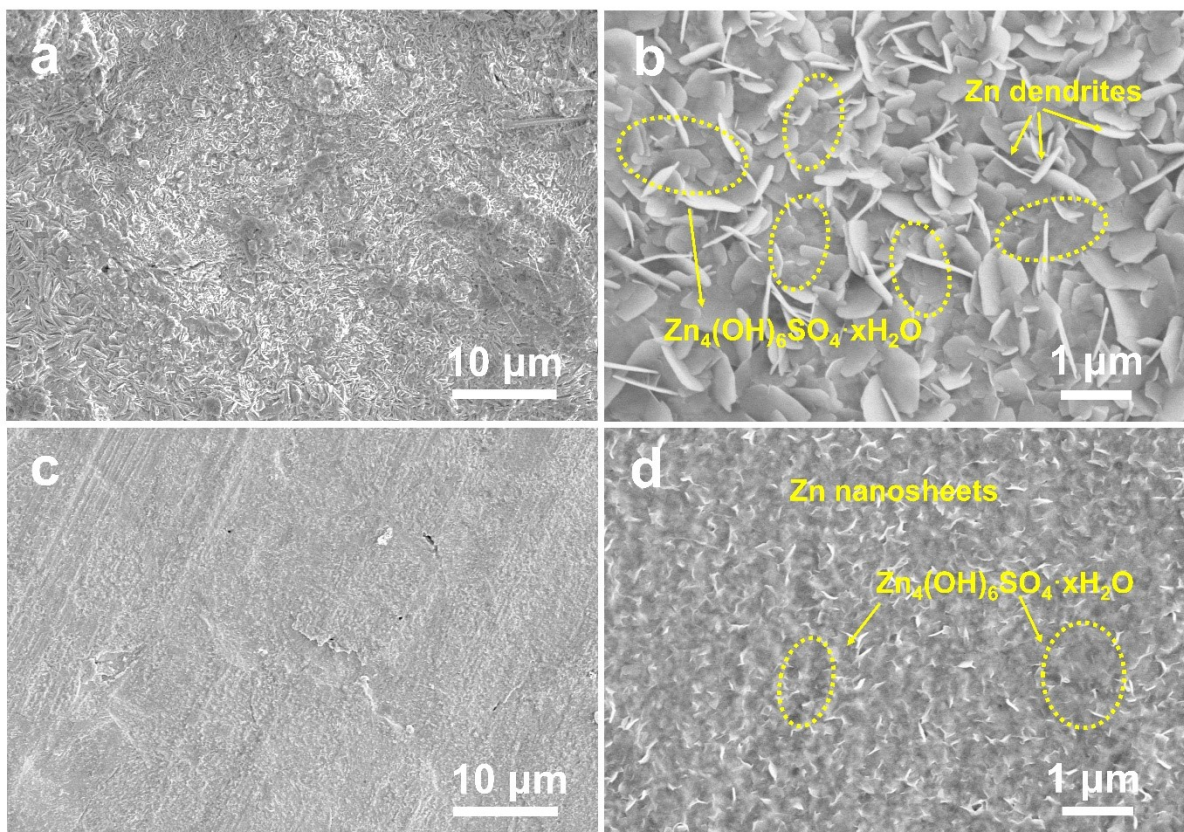

**Fig. S11** (a, c) Low-magnification and (b, d) high-magnification SEM images of Zn foils in Zn//Zn symmetrical batteries assembled with (a, b) GF and (c, d) g-C<sub>3</sub>N<sub>4</sub>/GF separators after cycling for 100 h at 2 mA cm<sup>-2</sup> and 2 mAh cm<sup>-2</sup>.



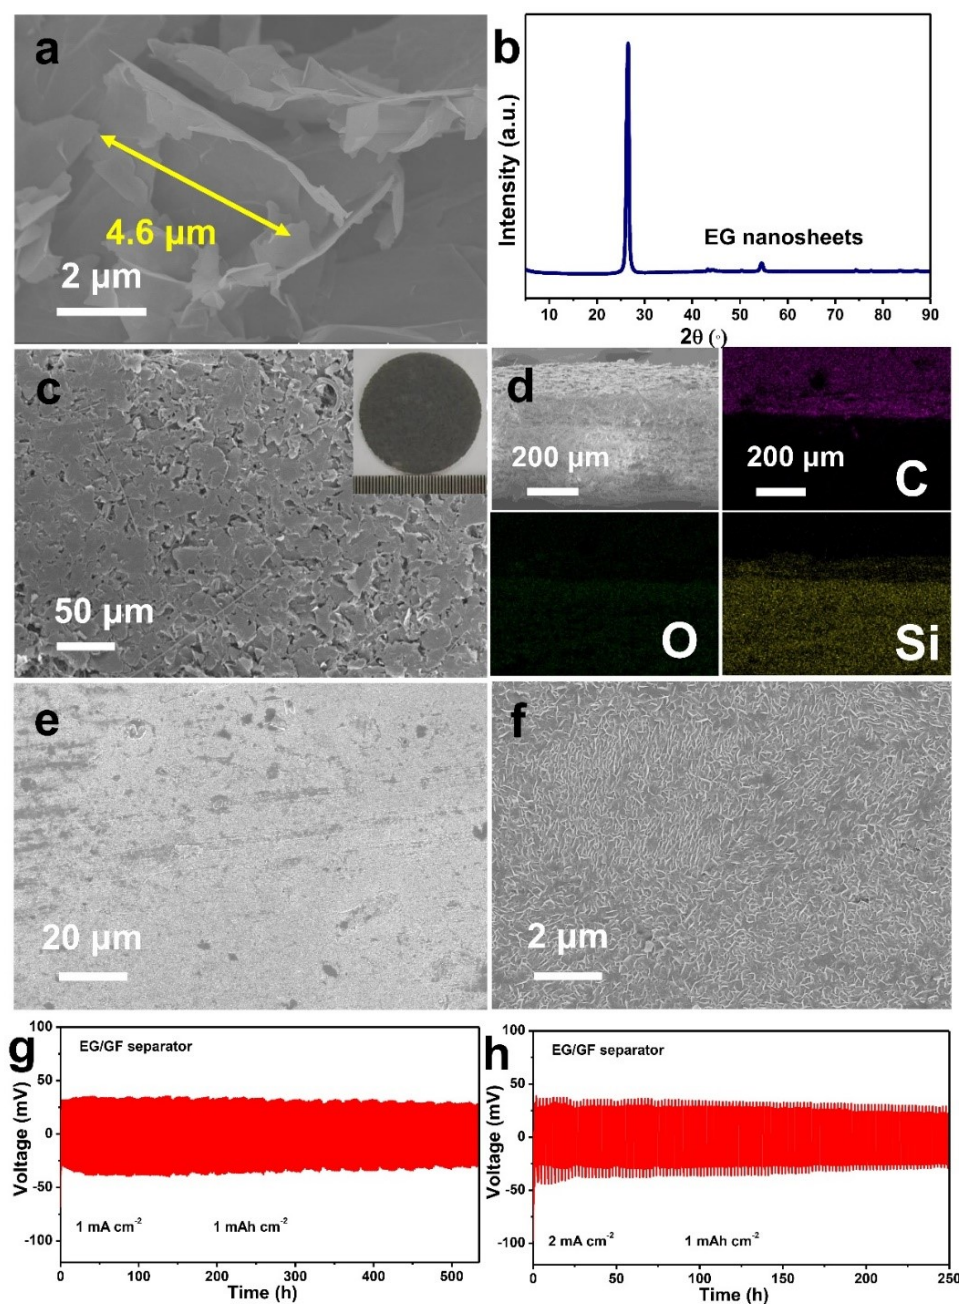

**Fig. S12** EG/GF separators for Zn anodes. (a) SEM image and (b) XRD pattern of EG nanosheets. (c) Top-view SEM image and photograph (inset) of EG/GF separator. (d) Cross-sectional SEM image and corresponding element mapping analysis of EG/GF separator. (e) Low magnification and (f) high magnification SEM images of Zn foil anode in Zn//Zn symmetrical batteries with EG/GF separators, which were plated with  $0.33 \text{ mAh cm}^{-2}$  at  $1 \text{ mA cm}^{-2}$ . Cycling performance of Zn//Zn symmetrical batteries with EG/GF separators at (g)  $1 \text{ mA cm}^{-2}$  for  $1 \text{ mAh cm}^{-2}$  and (h)  $2 \text{ mA cm}^{-2}$  for  $2 \text{ mAh cm}^{-2}$ .

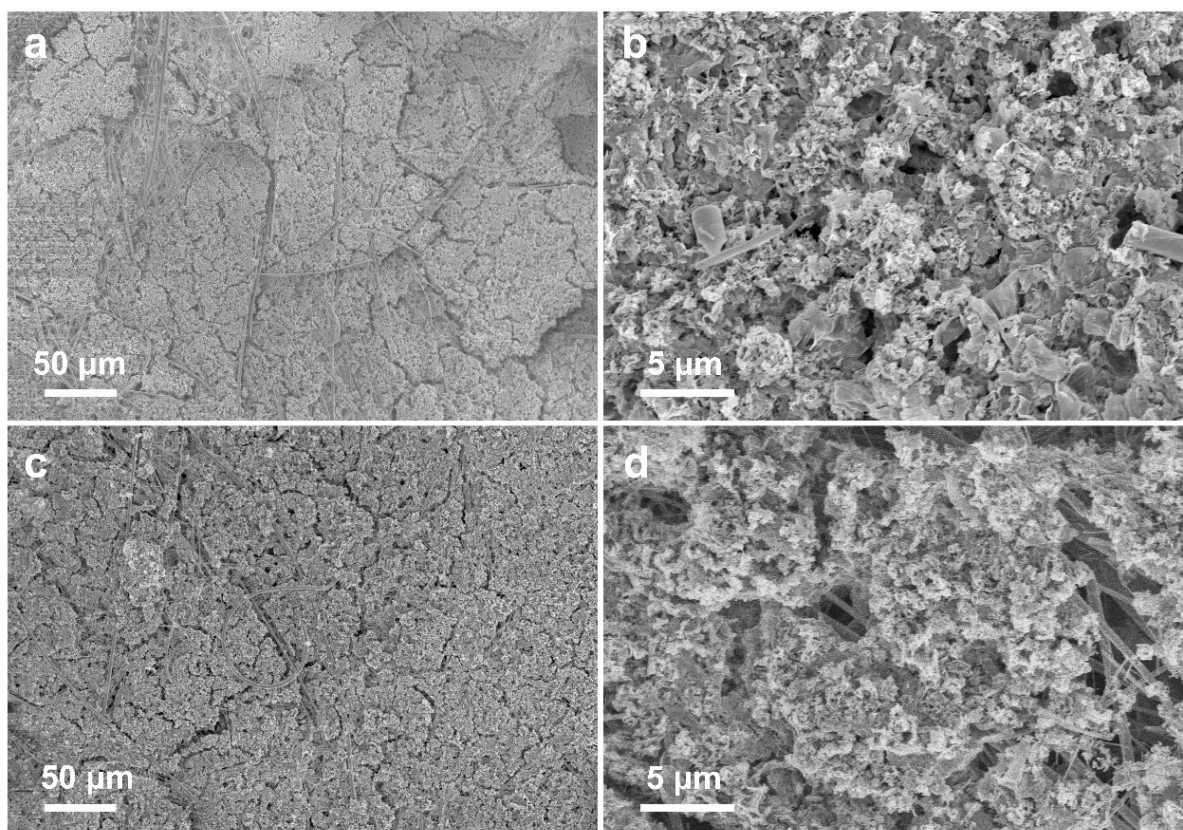

**Fig. S13** (a, c) Low magnification and (b, d) high magnification SEM images of g-C<sub>3</sub>N<sub>4</sub>/GF separators after Zn deposition of 0.33 mAh cm<sup>-2</sup> at (a, b) 1 mA cm<sup>-2</sup> and (c, d) 2 mA cm<sup>-2</sup>.

**Table S1** Comparison of electrochemical performance between g-C<sub>3</sub>N<sub>4</sub>/GF separators equipped Zn//Zn symmetrical batteries and reported works.

| Zn anode                                                                                                                                 | Current density             | Areal capacity               | Cycling life | Reference        |
|------------------------------------------------------------------------------------------------------------------------------------------|-----------------------------|------------------------------|--------------|------------------|
| g-C <sub>3</sub> N <sub>4</sub> /GF separators                                                                                           | <b>2 mA cm<sup>-2</sup></b> | <b>2 mAh cm<sup>-2</sup></b> | <b>700 h</b> | <b>This work</b> |
| kaolin-coated Zn anode (KL-Zn)                                                                                                           | 4.4 mA cm <sup>-2</sup>     | 1.1 mAh cm <sup>-2</sup>     | 800 h        | Ref [1]          |
| MXene-coated Zn foil (MZn-60)                                                                                                            | 0.2 mA cm <sup>-2</sup>     | 0.2 mAh cm <sup>-2</sup>     | 800 h        | Ref [2]          |
| TiO <sub>2</sub> coated Zn (Zn-TiO <sub>2</sub> )                                                                                        | 4.4 mA cm <sup>-2</sup>     | 1.1 mAh cm <sup>-2</sup>     | 500 h        | Ref [3]          |
| Al <sub>2</sub> O <sub>3</sub> coated Zn foils (Al <sub>2</sub> O <sub>3</sub> @Zn)                                                      | 1 mA cm <sup>-2</sup>       | 1 mAh cm <sup>-2</sup>       | 500 h        | Ref [4]          |
| 3D porous ZnO modified Zn anodes (Zn@ZnO-3D)                                                                                             | 5 mA cm <sup>-2</sup>       | 1.25 mAh cm <sup>-2</sup>    | 500 h        | Ref [5]          |
| NaTi <sub>2</sub> (PO <sub>4</sub> ) <sub>3</sub> protection layers on Zn anodes (NaTi <sub>2</sub> (PO <sub>4</sub> ) <sub>3</sub> @Zn) | 1 mA cm <sup>-2</sup>       | 1 mAh cm <sup>-2</sup>       | 250 h        | Ref [6]          |
| Zn <sub>x</sub> V <sub>2</sub> O <sub>5</sub> ·nH <sub>2</sub> O interfacial layer coated Zn (ZnVO-coated Zn)                            | 0.25 mA cm <sup>-2</sup>    | 0.05 mAh cm <sup>-2</sup>    | 560 h        | Ref [7]          |
| alucone deposited Zn anodes (60alucone@Zn)                                                                                               | 3 mA cm <sup>-2</sup>       | 1 mAh cm <sup>-2</sup>       | 780 h        | Ref [8]          |
| reduced graphene oxide coating on Zn anode (Zn/rGO anode)                                                                                | 1 mA cm <sup>-2</sup>       | 1 mAh cm <sup>-2</sup>       | 300 h        | Ref [9]          |
| electrodeposited Zn on 3D Ni (3D Ni-Zn anode)                                                                                            | 5 mA cm <sup>-2</sup>       | 2 mAh cm <sup>-2</sup>       | 200 h        | Ref [10]         |
| ZnO layer coated on a Zn hexagonal pyramid array (Zn@ZnO)                                                                                | 1 mA cm <sup>-2</sup>       | 1 mAh cm <sup>-2</sup>       | 400 h        | Ref [11]         |
| g-C <sub>3</sub> N <sub>4</sub> layer coated Zn anode (Zn/g-C <sub>3</sub> N <sub>4</sub> )                                              | 2 mA cm <sup>-2</sup>       | 2 mAh cm <sup>-2</sup>       | 500 h        | Ref [12]         |
| liquid metal modified Zn anode (LM@Zn)                                                                                                   | 1 mA cm <sup>-2</sup>       | 0.5 mAh cm <sup>-2</sup>     | 500 h        | Ref [13]         |
| In layer decorated Zn foils (Zn In)                                                                                                      | 1 mA cm <sup>-2</sup>       | 1 mAh cm <sup>-2</sup>       | 500 h        | Ref [14]         |
| Janus separator                                                                                                                          | 0.5 mA cm <sup>-2</sup>     | 0.5 mAh cm <sup>-2</sup>     | 300 h        | Ref [15]         |
| MOF/rGO functional separator                                                                                                             | 2 mA cm <sup>-2</sup>       | 1 mAh cm <sup>-2</sup>       | 500 h        | Ref [16]         |

## References

1. C. Deng, X. Xie, J. Han, Y. Tang, J. Gao, C. Liu, X. Shi, J. Zhou and S. Liang, *Adv. Funct. Mater.*, 2020, **30**, 2000599.
2. N. Zhang, S. Huang, Z. Yuan, J. Zhu, Z. Zhao and Z. Niu, *Angew. Chem. Int. Ed.*, 2021, **60**, 2861-2865.
3. X. Zhou, P. Cao, A. Wei, A. Zou, H. Ye, W. Liu, J. Tang and J. Yang, *ACS Appl. Mater. Interfaces*, 2021, **13**, 8181-8190.
4. H. He, H. Tong, X. Song, X. Song and J. Liu, *J. Mater. Chem. A*, 2020, **8**, 7836-7846.
5. X. Xie, S. Liang, J. Gao, S. Guo, J. Guo, C. Wang, G. Xu, X. Wu, G. Chen and J. Zhou, *Energy Environ. Sci.*, 2020, **13**, 503-510.
6. M. Liu, J. Cai, H. Ao, Z. Hou, Y. Zhu and Y. Qian, *Adv. Funct. Mater.*, 2020, **30**, 2004885.
7. P. Xiao, L. Xue, Y. Guo, L. Hu, C. Cui, H. Li and T. Zhai, *Sci. Bull.*, 2020, **66**, 545-552.
8. H. He and J. Liu, *J. Mater. Chem. A*, 2020, **8**, 22100-22110.
9. A. Xia, X. Pu, Y. Tao, H. Liu and Y. Wang, *Appl. Surf. Sci.*, 2019, **481**, 852-859.
10. G. Zhang, X. Zhang, H. Liu, J. Li, Y. Chen and H. Duan, *Adv. Energy Mater.*, 2021, **11**, 2003927.
11. J. Y. Kim, G. Liu, G. Y. Shim, H. Kim and J. K. Lee, *Adv. Funct. Mater.*, 2020, **30**, 2004210.
12. P. Liu, Z. Zhang, R. Hao, Y. Huang, W. Liu, Y. Tan, P. Li, J. Yan and K. Liu, *Chem. Eng. J.*, 2021, **403**, 126425.
13. H. Jia, Z. Wang, M. Dirican, S. Qiu, C. Y. Chan, S. Fu, B. Fei and X. Zhang, *J. Mater. Chem. A*, 2021, **9**, 5597-5605.
14. D. Han, S. Wu, S. Zhang, Y. Deng, C. Cui, L. Zhang, Y. Long, H. Li, Y. Tao, Z. Weng, Q. H. Yang and F. Kang, *Small*, 2020, **16**, 2001736.
15. C. Li, Z. Sun, T. Yang, L. Yu, N. Wei, Z. Tian, J. Cai, J. Lv, Y. Shao, M. H. Rummeli, J. Sun and Z. Liu, *Adv. Mater.*, 2020, **32**, 2003425.
16. Z. Wang, L. Dong, W. Huang, H. Jia, Q. Zhao, Y. Wang, B. Fei and F. Pan, *Nano-Micro Lett.*, 2021, **13**, 1-11.
